# Supplementary material for: Evaluation of kaolin floc characteristics during coagulation process: a case study with a continuous flow device
Source: Royal Society of Chemistry journal article supplement (doi:10.1039/c6ra06046c), 2016-01-01
Supplement: c6ra06046c1.pdf [file c6ra06046c1.pdf]

## Supplementary information for:

Evaluation of kaolin-floc characteristics during coagulation process: A case study with a continuous flow device

Zhenbei. Wang, Jun. Nan\*, Meng. Yao, Pengfei. Ren, Yueming. Yang

Skate Key Laboratory of Urban Water Resource and Environment, School of Municipal and Environmental Engineering, Harbin Institute of Technology, Harbin 150090, PR China

\*Corresponding author. Tel.: +86 451 86084169; fax: +86 451 86283001.

E-mail address: nanjun119@163.com (J. Nan)

This document consists of 2 pages, 1 table and 1 figure.

### TABLES

Table S1 Hydrodynamic conditions for all experiments mentioned in 3.2 and 3.3.

| Experiment number | First stage |        | Second stage |        | Third stage |        |
|-------------------|-------------|--------|--------------|--------|-------------|--------|
|                   | N(rpm)      | G(s-1) | N(rpm)       | G(s-1) | N(rpm)      | G(s-1) |
| 1                 | 180         | 71     | 140          | 48     | 90          | 25     |
| 2                 | 180         | 71     | 140          | 48     | 70          | 17     |
| 3                 | 180         | 71     | 120          | 38     | 90          | 25     |
| 4                 | 180         | 71     | 120          | 38     | 70          | 17     |
| 5                 | 160         | 59     | 140          | 48     | 90          | 25     |
| 6                 | 160         | 59     | 140          | 48     | 70          | 17     |
| 7                 | 160         | 59     | 120          | 38     | 90          | 25     |
| 8                 | 160         | 59     | 120          | 38     | 70          | 17     |

## FIGURES

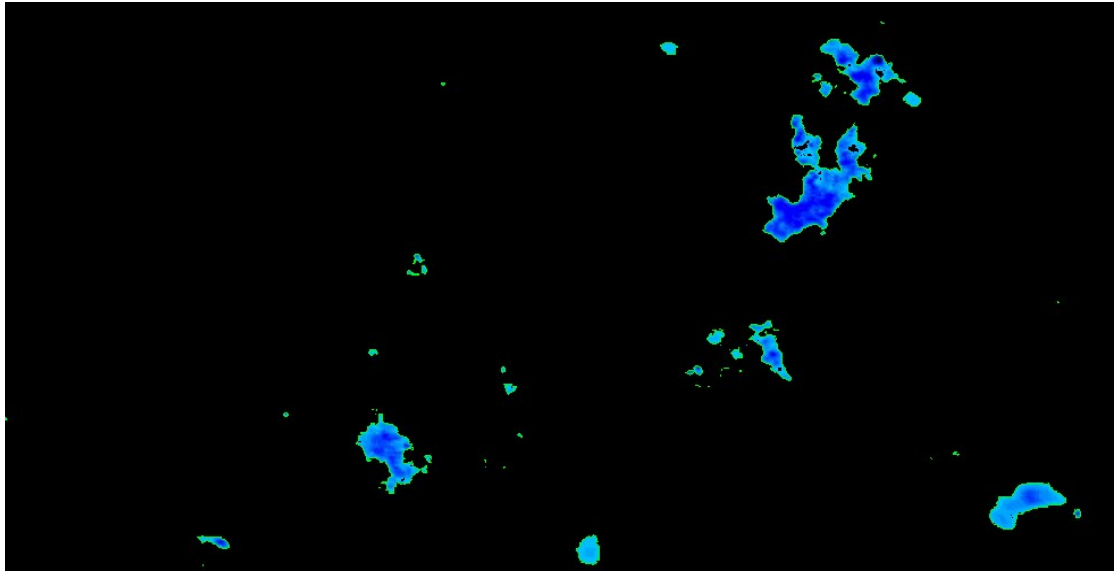

Fig. S1. Example of the PIV images of flocs after thresholding under shear rate combination 59 – 48 – 17 s<sup>-1</sup> (at 20min)
